# Supplementary material for: Use of deep learning to develop continuous-risk models for adverse event prediction from electronic health records
Source: Springer Nature journal article supplement (doi:10.1038/s41596-021-00513-5), 2021-05-05
Supplement: MOESM1 [file 41596_2021_513_MOESM1_ESM21.pdf]

---

## Supplementary information

---

# Use of deep learning to develop continuous-risk models for adverse event prediction from electronic health records

---

In the format provided by the  
authors and unedited

**Supplementary Table 1: Comparison between selected machine learning models for prediction of inpatient mortality.** Where available, the inpatient mortality rate of the dataset is shown. Note MIMIC-III has different rates due to different subsets being used. Triggering time refers to hours after admission when inference is triggered. 95% confidence intervals of performance are shown in brackets where available. GBM, Gradient Boosting Machine; GRU, Gated Recurrent Unit; GRU-D, Gated Recurrent Unit with Delay; FFNN, Feed Forward Neural Network; LSTM, Long Short Term Memory network; RNN, recurrent neural network.

| Paper                                      | Dataset (mortality rate)            | No. of input features | Primary model                     | Triggering                    | Outcome                 | AUROC [95% CI]      | AUPRC [95% CI]      |
|--------------------------------------------|-------------------------------------|-----------------------|-----------------------------------|-------------------------------|-------------------------|---------------------|---------------------|
| Nakas et al. (2016) <sup>91</sup>          | Inselspital Bern (2.4%)             | 23                    | Decision trees, FFNN              | Static, at admission          | In-hospital mortality   | 0.912               |                     |
| Johnson et al. (2017) <sup>4</sup>         | MIMIC-III                           | 148                   | GBM                               | Static, 24h                   | In-hospital mortality   | 0.927               |                     |
|                                            |                                     |                       |                                   | Random timepoint              |                         | 0.920               | 0.665               |
| Aczon et al. (2017) <sup>92</sup>          | CHLA paediatric ICU (4.9%)          | 300                   | RNN (LSTM)                        | Static, 12h                   | In-hospital mortality   | 0.934               |                     |
| Che et al. (2018) <sup>93</sup>            | MIMIC-III (8.7%)                    | 99                    | RNN (GRU-D)                       | Static, 48h                   | In-hospital mortality   | 0.853               |                     |
| Purushotham et al. (2018) <sup>34</sup>    | MIMIC-III (10.5%)                   | 20                    | RNN (FFNN, GRU ensemble)          | Static, 24h                   | In-hospital mortality   | 0.873               | 0.477               |
|                                            | MIMIC-III (10.5%)                   | 135                   |                                   | Static, 48h                   |                         | 0.941               | 0.786               |
| Rajkomar et al. (2018) <sup>20</sup>       | Hospital A (2.1%)                   | Full FHIR embedding   | RNN (ensemble LSTM)               | Static, 24h                   | In-hospital mortality   | 0.95 [0.94-0.96]    |                     |
|                                            | Hospital B (2.5%)                   |                       |                                   | Static, 24h                   |                         | 0.93 [0.92-0.94]    |                     |
| Wang et al. (2019) <sup>43</sup>           | MIMIC-III                           | 103                   | RNN (GRU-D)                       | Static, 24h                   | In-hospital mortality   | 0.876               | 0.532               |
| Caicedo-Torres et al. (2019) <sup>36</sup> | MIMIC-III (9.7%)                    | 22                    | CNN                               | Static, 24h                   | In-hospital mortality   | 0.822               |                     |
|                                            |                                     |                       |                                   | Static, 48h                   |                         | 0.874               |                     |
| Mayampurath et al. (2019) <sup>94</sup>    | U Chicago (2.5%)                    | 156                   | CNN + recurrent layer             | Static, 48h                   | In-hospital mortality   | 0.91 [0.90-0.92]    |                     |
| Harutyunyan et al. (2019) <sup>33</sup>    | MIMIC-III (13.2%)                   | 17                    | RNN (multitask channel-wise LSTM) | Static, 24h                   | In-hospital mortality   | 0.870 [0.852-0.887] | 0.533 [0.480-0.584] |
|                                            |                                     |                       |                                   | Continuous, 1-hourly          | Mortality in 24h        | 0.905 [0.902-0.908] | 0.317 [0.307-0.328] |
| Shickel et al. (2019) <sup>37</sup>        | U Florida ICU (10.4%)               | 14                    | RNN (GRU)                         | Static, 24h                   | In-hospital mortality   | 0.89 [0.88-0.90]    |                     |
|                                            |                                     |                       |                                   | Static, 48h                   |                         | 0.91 [0.90-0.91]    |                     |
|                                            | MIMIC-III (10.8%)                   | Static, 24h           |                                   |                               | 0.90 [0.89-0.90]        |                     |                     |
|                                            |                                     | Static, 48h           |                                   |                               | 0.91 [0.91-0.92]        |                     |                     |
| Fritz et al. (2019) <sup>95</sup>          | Barnes-Jewish intra-operative (1%)  | 56                    | Multi-path CNN                    | Randomly selected 1h interval | 30-day mortality        | 0.867 [0.835–0.899] | 0.095 [0.085-0.109] |
| Xia et al. (2019) <sup>96</sup>            | MIMIC-III (11.7%)                   | 50                    | RNN (ensemble LSTM)               | Continuous, daily             | 28-day mortality        | 0.85                | 0.45                |
| Nielsen et al. (2019) <sup>97</sup>        | Danish ICU disease registry (33.4%) | 44                    | FFNN                              | Static, 24h                   | In-hospital mortality   | 0.792               |                     |
| Brajer et al. (2020) <sup>85</sup>         | Duke (3.0%)                         | 195                   | GBM                               | Static, at admission          | In-hospital mortality   | 0.87 [0.83-0.89]    | 0.29 [0.25-0.37]    |
| Hilton et al. (2020) <sup>87</sup>         | Cleveland Clinic (1.4%)             | 171                   | GBM                               | Static, 24h                   | Mortality within 48-72h | 0.91                |                     |
